# Supplementary material for: Homochiral hybrid hexagonal antiperovskite crystals [R- and S-3-chloroquinuclidinium]3(CdCl3)(CdCl4)
Source: Royal Society of Chemistry journal article supplement (doi:10.1039/d4ce00504j), 2024-01-01
Supplement: d4ce00504j1.pdf [file d4ce00504j1.pdf]

# Homochiral Hybrid Hexagonal Antiperovskite Crystals [*R* and *S*-3-chloroquinuclidinium]<sub>3</sub>(CdCl<sub>3</sub>)(CdCl<sub>4</sub>)<sup>†</sup>

Zhe-Kun Xu,<sup>a</sup> Jia-Mei Zhang,<sup>a</sup> and Zhong-Xia Wang<sup>\*b</sup>

<sup>a</sup> Ordered Matter Science Research Center, Nanchang University, Nanchang 330031, People's Republic of China

<sup>b</sup> College of Chemistry and Chemical Engineering, Gannan Normal University, Ganzhou 341000, People's Republic of China.

\*Email: zhongxiawang@ncu.edu.cn

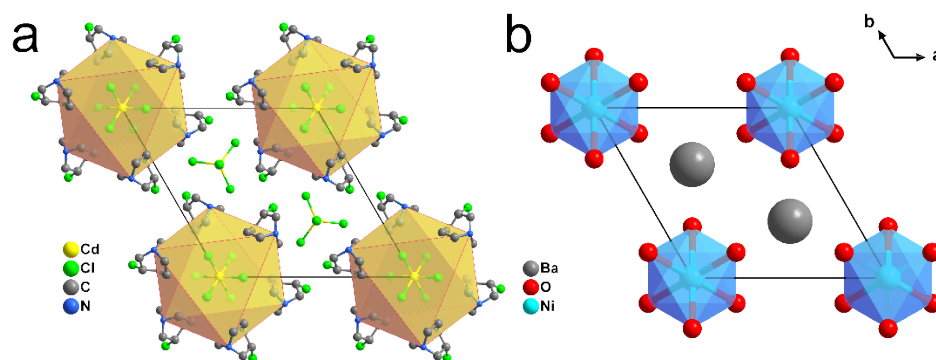

**Figure S1.** Comparison of the crystal structure of *R*-1 and BaNiO<sub>3</sub> along *c*-axis, H atoms were omitted for clarity.

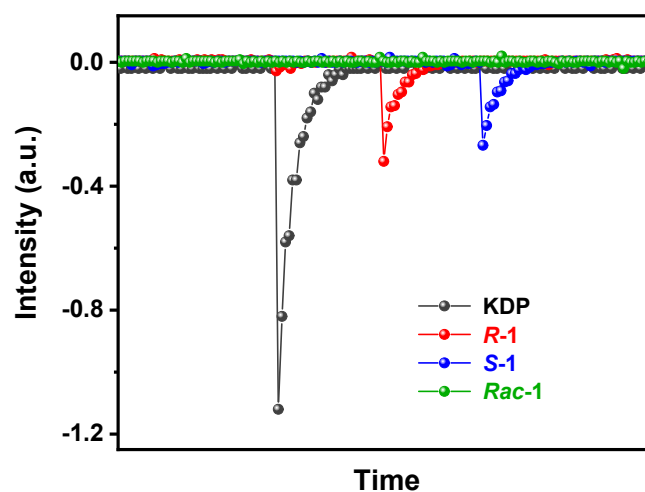

**Figure S2.** SHG intensity of *R*-1, *S*-1 and *Rac*-1 with the comparison of potassium dihydrogen phosphate (KDP). The measurements were performed using a 5 mg powder sample at room temperature.

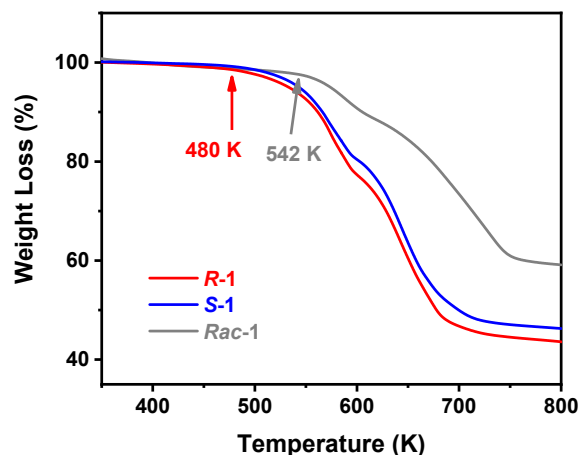

**Figure S3.** TGA of *R-1*, *S-1* and *Rac-1*, shows the decomposition points of *R-1* and *S-1* are up to 480 K, and the decomposition point of *Rac-1* is up to 542 K. TGA measurements were carried out in a heating run at the rate of 30 K/min under nitrogen atmosphere. The amount of powder sample used for the TGA is about 3 mg.

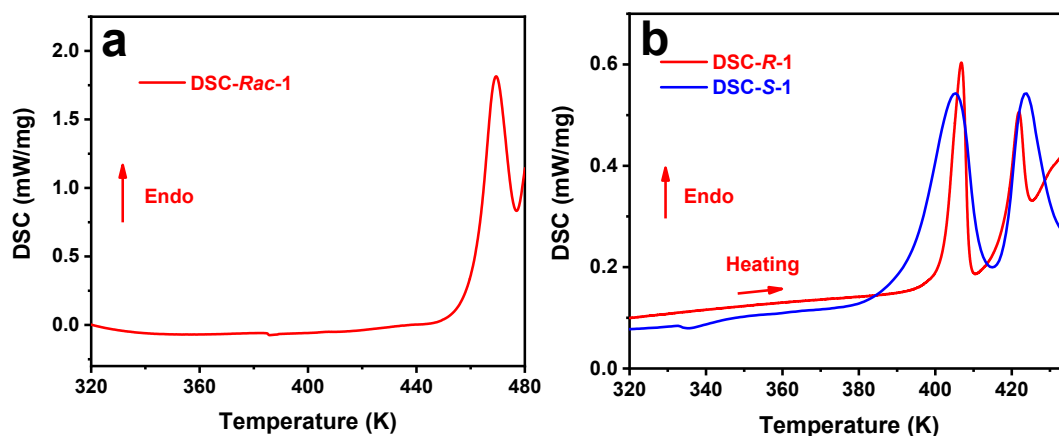

**Figure S4.** (a) DSC curve of *Rac-1*, showing no thermal anomaly before the melting point 469 K. (b) DSC curve of *R-1* and *S-1*, showing the phase transition point around 406 K and melting point around 423 K. DSC measurements were carried out in a heating run at the rate of 20 K/min under nitrogen atmosphere. The amount of powder sample used for the DSC is about 10 mg.

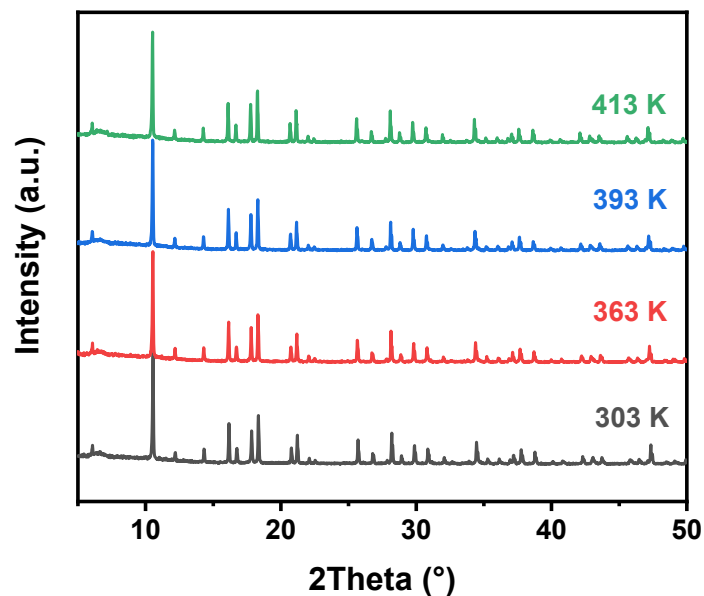

**Figure S5.** Temperature-dependent PXRD patterns for *R-1*. PXRD measurements were carried out in a heating run at the rate of 10 K/min. The amount of powder sample used is about 20 mg. The measurements are in the angle range from 5 to 50° with a step size of 0.02°.

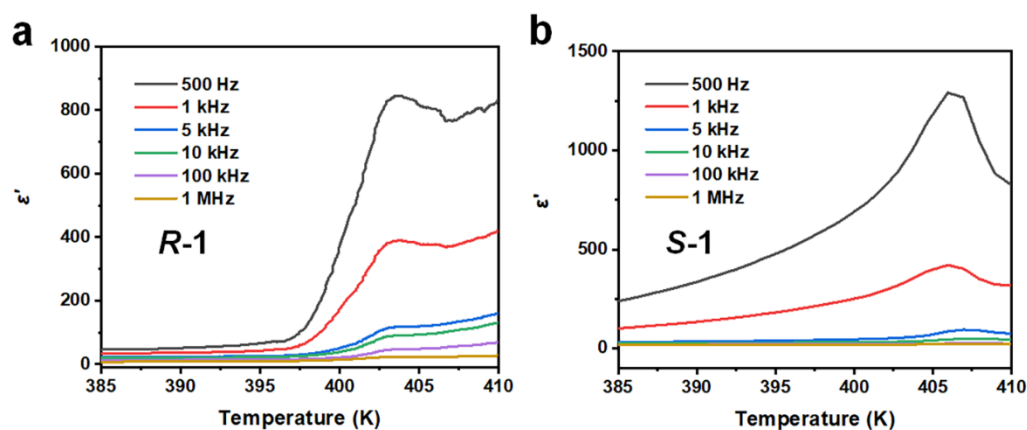

**Figure S6.** The temperature dependence of the dielectric real part for *R-1* (a) and *S-1* (b) at different frequencies (500 Hz – 1 MHz) in a heating run measured at the rate of 20 K/min. For dielectric tests, the powder sample is pressed into sheets of about 0.5mm.

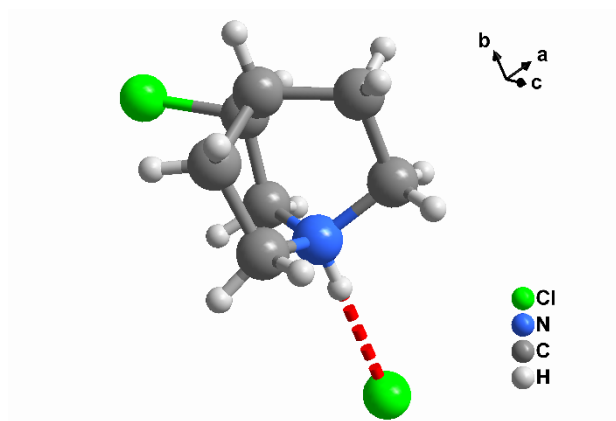

**Figure S7.** Crystal structure of *R*-3-chloroquinuclidinium chloride. The red dash stands for the hydrogen bond interactions.

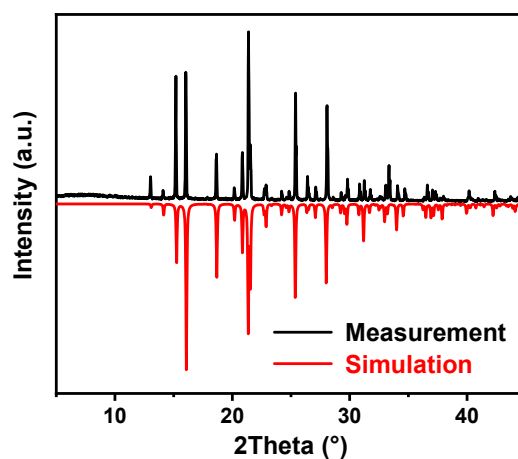

**Figure S8.** Comparison of measured and simulated PXRD patterns of *R*-3-chloroquinuclidinium chloride at room temperature. PXRD measurements were carried out in a heating run at the rate of 10 K/min. The amount of powder sample used is about 20 mg. The measurements are in the angle range from 5 to 45° with a step size of 0.02°. The simulated PXRD patterns are from the simulation of the crystal CIF file by Mercury software.

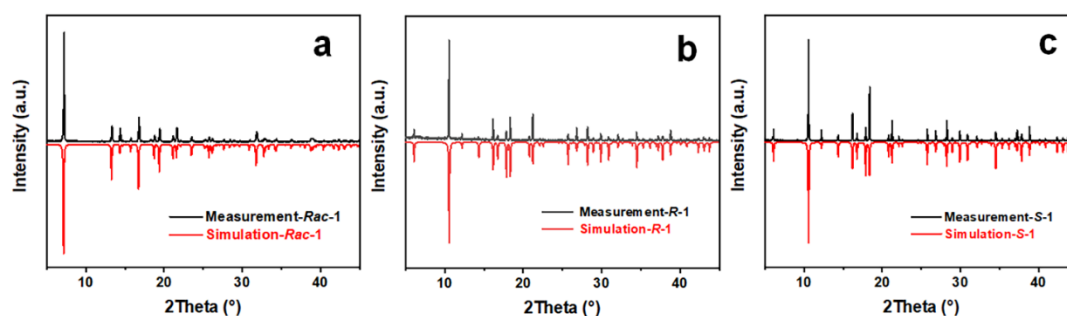

**Figure S9.** Comparison of measured and simulated PXRD patterns of *Rac*-1 (a), *R*-1 (b), and *S*-1 (c) at room temperature. PXRD measurements were carried out in a heating run at the rate of 10 K/min. The amount of powder sample used is about 20 mg. The measurements are in the angle range from 5 to 45° with a step size of 0.02°. The simulated PXRD patterns are from the simulation of the crystal CIF files by Mercury software.

**Table S1.** Crystal data and structure refinements for *Rac*-1, *R*-1, *S*-1 and *R*-3-chloroquinuclidinium chloride.

| Compound                                  | <i>Rac</i> -1 | <i>R</i> -1 | <i>S</i> -1  | <i>R</i> -3-chloroquinuclidinium chloride |
|-------------------------------------------|---------------|-------------|--------------|-------------------------------------------|
| Formula weight                            | 364.38        | 912.85      | 912.85       | 182.08                                    |
| Temperature/K                             | 293(2)        | 293(2)      | 293(2)       | 293(2)                                    |
| Crystal system                            | Monoclinic    | Hexagonal   | Hexagonal    | Orthorhombic                              |
| Space group                               | $P2_1/n$      | $P6_3$      | $P6_3$       | $P2_12_12_1$                              |
| $a/\text{Å}$                              | 7.1351(3)     | 16.8561(13) | 16.71020(10) | 8.3125(9)                                 |
| $b/\text{Å}$                              | 24.6782(7)    | 16.8561(13) | 16.71020(10) | 9.4931(9)                                 |
| $c/\text{Å}$                              | 7.2386(3)     | 6.8554(5)   | 6.81010(10)  | 11.6083(11)                               |
| $\alpha/\text{deg}$                       | 90            | 90          | 90           | 90                                        |
| $\beta/\text{deg}$                        | 107.239(4)    | 90          | 90           | 90                                        |
| $\gamma/\text{deg}$                       | 90            | 120         | 120          | 90                                        |
| Volume/ $\text{Å}^3$                      | 1217.32(8)    | 1686.9(3)   | 1646.82(3)   | 916.03(16)                                |
| $Z$                                       | 4             | 2           | 2            | 4                                         |
| Density/( $\text{g}\cdot\text{cm}^{-3}$ ) | 1.988         | 1.797       | 1.841        | 1.32                                      |
| $R_1 [I \geq 2\sigma(I)]$                 | 0.1025        | 0.0447      | 0.1135       | 0.0487                                    |
| $wR_2 [I \geq 2\sigma(I)]$                | 0.2507        | 0.0953      | 0.2707       | 0.1255                                    |
| $GOF$                                     | 1.029         | 0.998       | 1.191        | 1.032                                     |

**Table S2.** Selected N-H...Cl hydrogen bond parameters for *Rac*-1.

| D-H...A                             | $d(\text{D-H})/\text{Å}$ | $d(\text{H-A})/\text{Å}$ | $d(\text{D-A})/\text{Å}$ | D-H-A/deg |
|-------------------------------------|--------------------------|--------------------------|--------------------------|-----------|
| N(1)-<br>H(1)...Cl(3) <sup>#1</sup> | 0.98                     | 2.52                     | 3.274(5)                 | 133.3     |
| N(1)-H(1)...Cl(3)                   | 0.98                     | 2.83                     | 3.433(5)                 | 120.3     |
| N(1)-<br>H(1)...Cl(1) <sup>#1</sup> | 0.98                     | 2.95                     | 3.656(5)                 | 129.4     |

Symmetry Code: #12-X, -Y, 1-Z

**Table S3.** Selected Cd-Cl bond lengths [Å] and Cl-Cd-Cl angles [deg] for *Rac-1*.

| Atom-Atom                       | Length/Å         | Atom-Atom-Atom                                 | Angle/deg |
|---------------------------------|------------------|------------------------------------------------|-----------|
| Cd(1)-Cl(3)                     | 2.5519(12)       | Cl(1)-Cd(1)-Cl(3) <sup>#1</sup>                | 157.29(4) |
| Cd(1)-Cl(3) <sup>#1</sup>       | 2.6797(15)       | Cl(1) <sup>#2</sup> -Cd(1)-Cl(3) <sup>#1</sup> | 89.01(5)  |
| Cd(1)-Cl(1)                     | 2.6527(17)       | Cl(1) <sup>#2</sup> -Cd(1)-Cl(3)               | 133.99(4) |
| Cd(1)-Cl(1) <sup>#2</sup>       | 2.5132(14)       | Cl(1) <sup>#2</sup> -Cd(1)-Cl(1)               | 84.00(5)  |
| Cd(1)-Cl(2)                     | 2.4386(13)       | Cl(2)-Cd(1)-Cl(3)                              | 108.67(4) |
| Cd(1)-Cd(1) <sup>#1</sup>       | 3.9105(6)        | Cl(2)-Cd(1)-Cl(3) <sup>#1</sup>                | 98.33(5)  |
| Cd(1)-Cd(1) <sup>#2</sup>       | 3.8402(6)        | Cl(2)-Cd(1)-Cl(1)                              | 104.09(6) |
| <b>Atom-Atom-Atom</b>           | <b>Angle/deg</b> | Cl(2)-Cd(1)-Cl(1) <sup>#2</sup>                | 117.33(5) |
| Cl(3)-Cd(1)-Cl(3) <sup>#1</sup> | 83.29(4)         | Cl(3)-Cd(1)-Cl(1)                              | 86.11(5)  |

Symmetry Code: #12-X,-Y,2-Z;#23-X,-Y,2-Z

**Table S4.** Selected bond lengths [Å] and Cl-Cd-Cl angles [deg] for *R-1*.

| Atom-Atom                                      | Length/Å       | Atom-Atom-Atom                                 | Angle/°   |
|------------------------------------------------|----------------|------------------------------------------------|-----------|
| Cd(2)-Cl(3)                                    | 2.467(5)       | Cl(3)-Cd(2)-Cl(2)                              | 109.82(7) |
| Cd(2)-Cl(2) <sup>#1</sup>                      | 2.486(2)       | Cl(3)-Cd(2)-Cl(2) <sup>#1</sup>                | 109.82(7) |
| Cd(2)-Cl(2) <sup>#2</sup>                      | 2.486(2)       | Cl(3)-Cd(2)-Cl(2) <sup>#2</sup>                | 109.82(7) |
| Cd(2)-Cl(2)                                    | 2.486(2)       | Cl(2)-Cd(2)-Cl(2) <sup>#2</sup>                | 109.12(7) |
| Cd(1)-Cd(1) <sup>#3</sup>                      | 3.4277(3)      | Cl(2)-Cd(2)-Cl(2) <sup>#1</sup>                | 109.12(7) |
| Cd(1)-Cd(1) <sup>#4</sup>                      | 3.4277(3)      | Cl(2) <sup>#1</sup> -Cd(2)-Cl(2) <sup>#2</sup> | 109.12(7) |
| Cd(1)-Cl(1)                                    | 2.6790(19)     | Cl(1) <sup>#8</sup> -Cd(1)-Cl(1) <sup>#4</sup> | 83.46(7)  |
| Cd(1)-Cl(1) <sup>#5</sup>                      | 2.6793(19)     | Cl(1)-Cd(1)-Cl(1) <sup>#8</sup>                | 96.54(3)  |
| Cd(1)-Cl(1) <sup>#6</sup>                      | 2.6789(19)     | Cl(1) <sup>#6</sup> -Cd(1)-Cl(1) <sup>#4</sup> | 96.54(3)  |
| Cd(1)-Cl(1) <sup>#3</sup>                      | 2.6793(19)     | Cl(1) <sup>#7</sup> -Cd(1)-Cl(1) <sup>#5</sup> | 96.54(3)  |
| Cd(1)-Cl(1) <sup>#7</sup>                      | 2.6789(19)     | Cl(1) <sup>#6</sup> -Cd(1)-Cl(1) <sup>#5</sup> | 96.54(3)  |
| Cd(1)-Cl(1) <sup>#8</sup>                      | 2.6793(19)     | Cl(1) <sup>#7</sup> -Cd(1)-Cl(1)               | 83.47(7)  |
| <b>Atom-Atom-Atom</b>                          | <b>Angle/°</b> | Cl(1) <sup>#6</sup> -Cd(1)-Cl(1)               | 83.47(7)  |
| Cl(1) <sup>#5</sup> -Cd(1)-Cl(1) <sup>#4</sup> | 83.46(7)       | Cl(1)-Cd(1)-Cl(1) <sup>#4</sup>                | 96.54(3)  |
| Cl(1) <sup>#7</sup> -Cd(1)-Cl(1) <sup>#8</sup> | 96.54(3)       | Cl(1) <sup>#8</sup> -Cd(1)-Cl(1) <sup>#5</sup> | 83.46(7)  |
| Cl(1) <sup>#6</sup> -Cd(1)-Cl(1) <sup>#7</sup> | 83.47(7)       |                                                |           |

Symmetry Code: #11+Y-X,1-X,+Z;#21-Y,+X-Y,+Z;#3-Y+X,-1+X,-1/2+Z;#4-Y+X,-1+X,1/2+Z;#52-X,-Y,1/2+Z;#61-Y,-1+X-Y,+Z;#72+Y-X,1-X,+Z;#81+Y,1-X+Y,1/2+Z.

**Table S5.** Selected bond lengths [Å] and Cl-Cd-Cl angles [deg] for *S*-1.

| Atom-Atom                       | Length/Å       | Atom-Atom-Atom                                 | Angle/°   |
|---------------------------------|----------------|------------------------------------------------|-----------|
| Cl(3)-Cd(2)                     | 2.4720(18)     | Cl(1) <sup>#5</sup> -Cd(1)-Cl(1) <sup>#4</sup> | 83.26(6)  |
| Cd(2)-Cl(2)                     | 2.437(4)       | Cl(1)-Cd(1)-Cl(1) <sup>#8</sup>                | 83.45(6)  |
| Cd(1)-Cd(1) <sup>#4</sup>       | 3.40506(4)     | Cl(1) <sup>#7</sup> -Cd(1)-Cl(1) <sup>#6</sup> | 96.64(2)  |
| Cd(1)-Cd(1) <sup>#3</sup>       | 3.40504(5)     | Cl(1) <sup>#7</sup> -Cd(1)-Cl(1) <sup>#4</sup> | 96.64(2)  |
| Cd(1)-Cl(1) <sup>#4</sup>       | 2.6599(18)     | Cl(1) <sup>#6</sup> -Cd(1)-Cl(1) <sup>#5</sup> | 83.26(6)  |
| Cd(1)-Cl(1) <sup>#6</sup>       | 2.6599(18)     | Cl(1)-Cd(1)-Cl(1) <sup>#7</sup>                | 83.45(6)  |
| Cd(1)-Cl(1) <sup>#7</sup>       | 2.6550(18)     | Cl(1) <sup>#8</sup> -Cd(1)-Cl(1) <sup>#4</sup> | 96.64(2)  |
| Cd(1)-Cl(1) <sup>#9</sup>       | 2.6599(18)     | Cl(1) <sup>#6</sup> -Cd(1)-Cl(1) <sup>#4</sup> | 83.26(6)  |
| Cd(1)-Cl(1)                     | 2.6550(18)     | Cl(1) <sup>#8</sup> -Cd(1)-Cl(1) <sup>#7</sup> | 83.45(6)  |
| Cd(1)-Cl(1) <sup>#8</sup>       | 2.6550(18)     | Cl(1)-Cd(1)-Cl(1) <sup>#5</sup>                | 96.64(2)  |
| <b>Atom-Atom-Atom</b>           | <b>Angle/°</b> | Cl(1) <sup>#8</sup> -Cd(1)-Cl(1) <sup>#5</sup> | 96.64(2)  |
| Cl(3)-Cd(2)-Cl(3) <sup>#2</sup> | 109.11(7)      | Cl(1)-Cd(1)-Cl(1) <sup>#6</sup>                | 96.64(2)  |
| Cl(2)-Cd(2)-Cl(3)               | 109.83(7)      | Cl(3) <sup>#1</sup> -Cd(2)-Cl(3)               | 109.11(7) |
| Cl(2)-Cd(2)-Cl(3) <sup>#2</sup> | 109.83(7)      | Cl(3) <sup>#1</sup> -Cd(2)-Cl(3) <sup>#2</sup> | 109.11(7) |
| Cl(2)-Cd(2)-Cl(3) <sup>#1</sup> | 109.83(7)      |                                                |           |

Symmetry Code: <sup>#1</sup>1-Y,+X-Y,+Z;<sup>#2</sup>1+Y-X,1-X,+Z;<sup>#3</sup>-X,-Y,-1/2+Z;<sup>#4</sup>-X,-Y,1/2+Z;<sup>#5</sup>+Y,-X+Y,1/2+Z;<sup>#6</sup>-Y+X,+X,1/2+Z;<sup>#7</sup>-Y,+X-Y,+Z;<sup>#8</sup>+Y-X,-X,+Z;<sup>#9</sup>+Y,-X+Y,1/2+Z

**Table S6.** The information of optical rotations.

| Optical Rotation $[\alpha]_D^{25}/^\circ$ | <i>R</i> | <i>S</i> |
|-------------------------------------------|----------|----------|
| Hexagonal antiperovskites                 | +9.085   | -9.072   |
| 3-chloroquinuclidinium chloride           | +30.23   | -30.15   |
